1 **Differences in spore size and atmospheric survival shape stark contrasts in the dispersal**  
2 **dynamics of two closely related fungal pathogens**

3  
4 Jacob Golan<sup>1\*</sup>, Daniele Lagomarsino Oneto<sup>2\*</sup>, Shunping Ding<sup>3</sup>, Reinhard Kessenich<sup>1</sup>, Melvin  
5 Sandler<sup>4</sup>, Tomás A. Rush<sup>5</sup>, Daniel Levitis<sup>1</sup>, Amanda Gevens<sup>6</sup>, Agnese Seminara<sup>3</sup>, Anne Pringle<sup>1,7</sup>

- 6  
1. Department of Botany, University of Wisconsin-Madison, Madison, WI, 53706, USA  
2. MalGa, Department of Civil, Chemical and Environmental Engineering, University of Genoa, via Montallegro 1, 16145 Genoa IT  
3. Wine and Viticulture Department, California Polytechnic State University, San Luis Obispo, CA, 93407, USA  
4. Department of Electrical Engineering, The Cooper Union for the Advancement of Science and Art, New York, NY 10003, USA  
5. Biosciences Division, Oak Ridge National Laboratory, Oak Ridge, Tennessee, 37830, USA  
6. Department of Plant Pathology, University of Wisconsin-Madison, Madison, WI, 53706, USA  
7. Department of Bacteriology, University of Wisconsin-Madison, Madison, WI, 53706, USA

\*Authors contributed equally to this work

7  
8 Author for correspondence:

9 Jacob Golan

10 Tel: +1 608-890-4364

11 Email: [jgolan@wisc.edu](mailto:jgolan@wisc.edu)

12  
13 **Competing Interests:** None

14  
15 **Sources of Support:**

16 **J.G.** was funded by a National Science Foundation Graduate Research Fellowship, North  
17 American Mycological Association Memorial Fellowship, and a University of Wisconsin-  
18 Madison Botany Department E.K. and O.N. Allen Fellowship; **A.S.** and **D.L.O.** were funded by  
19 the European Research Council (ERC) under the European Union's Horizon 2020 research and  
20 innovation programme (grant agreement No. 101002724 RIDING); the Air Force Office of  
21 Scientific Research under award number FA8655-20-1-7028.; **T.A.R.** was funded by the  
22 Genomic Sciences Program, U.S. Department of Energy, Office of Science, Biological and  
23 Environmental Research, as part of the Plant-Microbe Interfaces Scientific Focus Area at ORNL  
24 (<http://pmi.ornl.gov>); Oak Ridge National Laboratory is managed by UT-Battelle, LLC, for the  
25 U.S. Department of Energy under contract DEAC05-00OR22725; **A.P.** was funded by the  
26 United States Department of Agriculture, National Institute of Food and Agriculture, Hatch  
27 1013478 and the University of Wisconsin-Madison Botany Department; **A.G.** and **S.D.** were  
28 funded by UW Madison CALS Hatch Program Project WIS01855 (2015-2019).

29  
30  
31  
32  
33  
34

35 **Abstract** A frequently ignored but critical aspect of microbial dispersal is survival in the  
36 atmosphere. We exposed spores of two closely related, morphologically dissimilar, and  
37 economically important fungal pathogens to typical atmospheric environments and modeled their  
38 movement in the troposphere. We first measured the mortality of *Alternaria solani* and *A.*  
39 *alternata* conidia exposed to ranges of solar radiation, relative humidity, and temperature. We  
40 then measured survival in an advantageous environment over 12 days. *A. solani* conidia are  
41 nearly 10 times larger than *A. alternata* conidia and most die after 24 hours. By contrast, over  
42 half of *A. alternata* conidia remained viable at 12 days. The greater viability of the smaller  
43 spores is counterintuitive as larger spores are assumed to be more durable. To elucidate the  
44 consequences of survival rates for dispersal, we deployed models of atmospheric spore  
45 movement across North American. We predict 99% of the larger *A. solani* conidia settle within  
46 24 hours, with a maximum dispersal distance of 100 km. By contrast, most *A. alternata* conidia  
47 remain airborne for more than 12 days and long-distance dispersal is possible, e.g., from  
48 Wisconsin to the Atlantic Ocean. We observe that the larger conidia of *A. solani* survive poorly  
49 but also land sooner and move over shorter distances as compared to the smaller conidia of *A.*  
50 *alternata*. Our data relating larger spore size to poorer survival in the atmosphere and shorter  
51 distances travelled likely translate to other fungal species and highlight the potential for starkly  
52 different dispersal dynamics among even closely related fungi.

53

## 54 **INTRODUCTION**

55 A frequently ignored but critical aspect of microbial dispersal is survival during travel.  
56 Fungal dispersal is mediated by spores, and in some species, spores are reported to cross  
57 continents or oceans in air currents (1; 2; 3). But whether spores remain viable after continental

58 or oceanic crossings is unclear (4). As a result, an understanding of effective dispersal (defined  
59 as the fraction of spores returning to ground alive) remains elusive (4; 5). Measuring not only  
60 how far spores travel (i.e., their dispersal kernel) but also how long spores remain viable in the  
61 atmosphere (i.e., their “survival kernel”) is crucial. Tracking spores and measuring germination  
62 in nature is difficult (4; 6; 7) but measuring survival in the laboratory and connecting survival  
63 data to realistic models of movement offers one path to estimate effective dispersal.

64 Spore survival is often measured in terms of “germinability,” defined as the proportion of  
65 spores germinating after exposure to environmental or experimental conditions (8). Studies  
66 measuring germinability in contexts relevant to the atmosphere suggest survival is most impacted  
67 by water loss and damage from solar radiation (8; 9; 10; 11; 12). Desiccation sensitivity varies  
68 among species (13; 14) and appears to be determined by spore wall thickness, spore surface area,  
69 and relative water content within a spore (12; 15; 16; 17). High humidity is generally associated  
70 with increased germinability (8) but some species’ spores—including smut teliospores, and  
71 *Aspergillus fumigatus* and *Penicillium* spp. conidia—are released when environments are dry  
72 (10; 18; 19), perhaps to postpone germination until after deposition.

73 Temperature also influences germination, but temperature’s influence is not the same for  
74 every species: while colder temperatures (between 12.5 and 15.8°C) appear to maintain the  
75 germinability of *Pseudogymnoascus destructans* conidia (20), between 90-99% of *Phakopsora*  
76 *pachyrhizi* urediniospores fail to germinate after exposure to similarly cold temperatures (21; 22;  
77 23). Temperature appears to be a minor influence for other species; *A. fumigatus* ascospores  
78 survive a broad range of temperatures, including heating at 70°C for 30 minutes (24). Some  
79 species can withstand extreme temperatures, e.g., 15% of *Cladosporium cladosporioides* conidia  
80 germinate after transient exposure to 300°C (25).

81 High-frequency solar radiation also influences spores' survival (26; 27). Light in the  
82 ultraviolet (UV) spectrum (400-100nm) damages the DNA of many organisms, including fungi  
83 (9; 10; 28). Spores traveling in the troposphere are exposed exclusively to UVA (400-315nm)  
84 and UVB (315-280nm) because ozone filters shorter wavelengths (below 280nm; 29; 30). UV  
85 radiation varies significantly by latitude and altitude, and exposure changes according to cloud  
86 cover, time of day, season, and the integrity of the ozone layer at any given location (31). A  
87 spore in the atmosphere encounters variability in terms of both wavelength and dosage rate (or  
88 irradiance:  $W/m^2$ ). Some species are less resilient to UV damage (e.g., *Cladosporium herbarum*;  
89 32) than others (e.g., *Mycosphaerella fijiensis*; 33), and other species have adapted to avoid  
90 damage, e.g., through spore melanization (*Aspergillus niger*; 34) or spore clumping (*Phakopsora*  
91 *pachyrhizi*; 35; 36).

92 A spore's exposure to adverse humidity, temperature and solar radiation during aerial  
93 dispersal is shaped primarily by the interplay between air turbulence and gravity; these forces  
94 keep spores aloft for different times as a function of spore shape, size, or other aspects of  
95 morphology (5; 37; 38; 39; 40). Natural selection can affect potential flight times, e.g., by  
96 altering spore aerodynamics or the timing of spore release (5; 41). Fungi have also evolved traits  
97 to minimize damage from water loss or UV exposure and to navigate myriad other constraints  
98 related to movement (4; 12; 23; 38; 42; 43).

99 To elucidate how patterns of spore survival define the distances reached by living spores, we  
100 tested how laboratory environments relevant to atmospheric travel impact germinability.

101 Experiments were conducted using conidia of two economically important plant pathogens:  
102 *Alternaria alternata* and *A. solani*, whose conidia and natural histories are strikingly different.  
103 While *A. alternata* is a ubiquitous, cosmopolitan species with small spores (forming chains of

104 obovate-obtuse conidia, 10-15 $\mu$ m in length), *A. solani* spores are large (forming solitary,  
105 obovate-oblong conidia 75-100 $\mu$ m in length) and the species is primarily associated with  
106 solanaceous (especially potato and tomato) crops (44; 45; 46; 47). Both species pose serious  
107 threats to solanaceous crops and conidia often co-infect the same plant (47; 48).

108 In a first experiment (Experiment 1), we exposed conidia of *A. alternata* and *A. solani* to a  
109 range of relative humidities (RH), temperatures (T), and UV wavelengths and intensities (UV)  
110 for 96 hours. Data were used to identify combinations of RH, T and UV favorable to the  
111 retention of germinability. In a second experiment (Experiment 2), we exposed approximately  
112  $10.0^6$  and  $10.5^5$  spores of *A. alternata* and *A. solani* to a favorable environment for over 12 days  
113 (288 hours), a timescale relevant to continental or oceanic dispersal (1; 2; 49; 50). We next used  
114 simulations of particle transport in atmospheres to model the dispersal of spores (51; 52).  
115 Ultimately, patterns of effective dispersal emerge as strikingly different between these two  
116 closely related species.

117

## 118 MATERIALS & METHODS

### 119 Overview

120 In Experiment 1 we exposed conidia of *A. alternata* and *A. solani* to open air with different  
121 combinations of ultraviolet wavelengths and irradiance (UV), relative humidities (RH), and  
122 temperatures (T). We chose RH and T ranges relevant to spores dispersing in the troposphere and  
123 tested ten combinations (1-10, Table S1) typical of central Wisconsin in summer (53; 54). We  
124 conducted experiments in a single controlled environmental chamber at the University of  
125 Wisconsin Biotron (Madison, WI, USA) and the ten combinations of RH-T were tested  
126 sequentially in this single chamber. For each RH-T combination, we tested 21 UV strengths,

127 including both realistic and unrealistic irradiances (56; 57; 58; Table S2) for a total of 10 RH-T  
128 conditions x 21 UV strengths = 210 treatments per species. We ran each iteration of Experiment  
129 1 for 96 hours. We measured germinability at 24, 48, 72, and 96 hours. Next, we sought to  
130 understand how long conidia could live in a nearly ideal environment, an experiment designed to  
131 test the maximum potential reach of each species. In Experiment 2 we used a combination of  
132 UV-RH-T favorable to the retention of germinability as a single environment in two  
133 experimental runs, one for *A. alternata* (2A) and a second for *A. solani* (2S). We conducted  
134 Experiment 2 for 288 hours (12 days) and measured germinability at 0, 24, 48, 72, 144, 216, and  
135 288 hours (or days 0, 1, 3, 6, 9, and 12). Methods used to collect and generate *A. alternata* and *A.*  
136 *solani* conidia are found in Supporting Information 1.

137

### 138 **Exposing spores to different combinations of UV-RH-T (Experiments 1 and 2)**

139 *Physical setup:* For Experiment 1, a series of plexiglass platforms were cut and fit as steps  
140 into a frame made of PVC pipes (Figure 1). Because irradiance is inversely proportional to the  
141 squared distance between a light source and a surface, each graduated step was exposed to a  
142 different intensity of UV (compare Figure 1 and Table S2). Each plexiglass step measured 20.32  
143 cm wide by 66.04 cm long; six steps were placed under 40 W<sub>UVA</sub>, six under 40 W<sub>UVB</sub>, four under  
144 15 W<sub>UVA</sub>, four under 15 W<sub>UVB</sub>, and one in 0 W (i.e., complete darkness); a total of 21 steps or  
145 surfaces.

146 For Experiment 2, a single 121.92 cm (48 in) long by 66.04 cm (26 in) wide plexiglass step  
147 or platform was placed under a light source at a strength consistent with the single treatment  
148 chosen from Experiment 1.

149        *Conidial manipulation*: Experiment 1 conidia were first placed on microscope coverslips.  
150        Coverslips were prepared by spreading 50  $\mu$ L of a gently mixed, concentrated conidial  
151        suspension onto the upper surface of a sterile 19x19 mm ultra-thin (0.25mm) quartz cover slip  
152        (Chemglass Life Sciences, Vineland, New Jersey, USA). Coverslips were left to dry in darkness  
153        for a few minutes before being placed in the environmental chamber. For each of Experiment 1's  
154        10 conditions, coverslips were placed as two rows of 16 on each step (32 coverslips per UV-RH-  
155        T treatment; 16 for each species, Figure 1); coverslips were arranged according to a randomized  
156        block design. As each of the 10 conditions included a total of 32 coverslips for each of 21  
157        treatments the total number of coverslips for each experimental run was 672 (336 coverslips per  
158        species). In total, the 10 conditions involved 6,720 coverslips.

159        Experiment 2 conidia were spread onto glass slides instead of coverslips. A total of 238  
160        25x75 mm glass microscope slides (Globe Scientific, Mahwah, New Jersey, USA) per species  
161        were coated in 200  $\mu$ L of conidia suspensions and left to dry in darkness for a few minutes  
162        before being placed in the environmental chamber. For each of the two runs (2A and 2S), a total  
163        of 217 slides were randomly placed as a grid across the single plexiglass platform. The  
164        remaining 21 slides were kept in complete darkness.

165        *Light treatments*: In Experiment 1, UVP XX-Series UV Bench Lamps (Analytikjena, Jena,  
166        Germany) were suspended above the plexiglass steps (Figure 1) to generate different intensities  
167        of UV (Table S2). Irradiances were measured for each step with a UV Light Meter (Sper  
168        Scientific Direct, Scottsdale, Arizona, USA) at the start of each experimental run (Table S2). To  
169        prevent leakage of UV light from one module to another, black plastic fabric was placed between  
170        modules, and the UV Light Meter was used to confirm both that no light was leaking between  
171        modules and that the step kept in darkness was dark. In Experiment 2, fixtures emitting only

172 UVA ( $6.29 \pm 0.17$  W/m<sup>2</sup> for both species) were placed above the single treatment surface. In both  
173 experiments, day-night cycles were approximated by alternating 12 hours of continuous UV  
174 irradiation with 12 hours of darkness.

175 *Relative humidity and temperature:* In Experiment 1, the environmental chamber was  
176 calibrated to one of the 10 RH-T conditions (Table S1). These RH and T values are typical of  
177 central Wisconsin during the peak seasonal concentrations of airborne conidia of *A. alternata* and  
178 *A. solani* (54; 55). In Experiment 2, a single RH and T found to favor the retention of  
179 germinability for *A. alternata* (RH=90%, T= 15°C) and *A. solani* (RH=90%, T= 20°C) was held  
180 for 288 hours. In both Experiments 1 and 2, RH and T were monitored every five minutes to  
181 ensure conidia were consistently exposed to a given treatment.

182

### 183 **Measuring germinability**

184 *Imaging:* Conidia were germinated according to methods provided in Supporting  
185 Information. After 24 hours conidia were counted ( $N_{total}$ ). The slide holder on an Olympus CX31  
186 compound microscope (Olympus, Tokyo, Japan) was removed so that conidia could be observed  
187 directly from agar plates. All conidia were visualized using an Olympus PlanApo N 2x objective  
188 lens (Olympus, Tokyo, Japan). To increase light penetration through agar, the microscope light  
189 condenser was removed. Digital images were captured using a Canon EOS Rebel II (Canon,  
190 Tokyo, Japan) with a Martin Widefield 1.38x DSLR adapter for Olympus BX and SZX with 51  
191 mm dovetail photoport (Easley, South Carolina, USA), resulting in a total magnification of  
192 2.76x. In Experiment 1, ten non-overlapping images of conidia were randomly captured from  
193 each plate at each condition and time, and the number of germinated spores was counted  
194 ( $N_{germinate}$ ).



195 In Experiment 2 the same protocols were followed but five images were captured per plate  
196 for *A. alternata* and 20 images were captured per plate for *A. solani*. Image numbers differ to  
197 account for differences in the density of conidia observed between species.

198 *Image processing*: Custom algorithms developed by MIPAR v3.2 (Worthington, Ohio, USA)  
199 were used to count germinated and ungerminated conidia. Conidia size and germ tube  
200 development are different for the two *Alternaria* species, and as a result, species-tailored  
201 counting algorithms were used. A full description of image processing protocols is found in  
202 Supporting Information 2. In brief: out-of-focus features of each image were removed, as were  
203 features outside of the size range of conidia. Thresholding substantially reduced noise caused by  
204 debris and uncountable clusters of conidia (Figure 2). Remaining features were then classified as  
205 either germinated or ungerminated conidia. To ground truth the counting algorithms, 50 images  
206 of *A. alternata* and *A. solani* were randomly selected and germinated and ungerminated conidia  
207 counted by eye. Manual counts of live and dead conidia were compared to results generated from  
208 our custom software (Supporting Information 1; Figure S1).

209

## 210 **Statistical analyses**

211 *Mixed effect models*: We used the R package *glmmTMB* (59; 60) to test for significant  
212 differences among the numbers of germinated conidia across treatments in Experiments 1 and 2.  
213 The number of germinated and ungerminated conidia was calculated per coverslip and modeled  
214 using a log link function and log-transformed mean total number of conidia as an offset (59).

215 Experiment 1 data: variables included days of exposure, UV wavelength (including  
216 darkness), distance from a UV light source, RH and T; each species was analyzed separately.  
217 Random effects were included to account for any deviations in environmental chamber

218 performance or for fluctuations in UV intensity across a step (Figure 1). We computed full  
219 models and then simplified models by removing uninformative variables using the corrected  
220 Akaike Information Criterion (AICc) (Table 1). In addition, we performed Tukey's *post-hoc* tests  
221 to correct for multiple comparisons of means (Table S3(B); 60).

222 *An additional analysis:* In a separate analysis of Experiment 1 data, we tested for significant  
223 effects of UV, RH and T on conidia germination using Kruskal–Wallis tests followed by *post-*  
224 *hoc* assessments of significance using Dunn's multiple comparisons with a Benjamini-Hochberg  
225 adjustment (Table S4; R Core Team 2020). Germination at hour 96 only was compared across  
226 (a) UV wavelengths (UVA, UVB, and darkness), (b) RHs per UV wavelength (e.g., UVA-50%  
227 RH vs. UVA-90% RH), (c) Ts per UV wavelength (e.g., UVB-20°C vs. UVB-15°C), and (d)  
228 conditions (e.g., Experiment 1 condition 1 vs. Experiment 1 condition 2, etc.).

229

### 230 **Using models of atmospheric transport to simulate dispersal across space over time**

231 To understand how patterns of germinability affect the movement of both *Alternaria* species  
232 across North America, we modelled the transport of *A. alternata* and *A. solani* conidia in the  
233 atmosphere. A full description of model parameters and methods is found in (5). Briefly:  
234 numerical simulations tracked many representative trajectories of spores in the atmosphere using  
235 meteorological data available from the National Oceanic and Atmospheric Administration  
236 (NOAA) and the Hybrid Single-Particle Lagrangian Integrated Trajectory (HYSPLIT) model  
237 (61). Specifically, we used the North American Regional Reanalysis described in (62), as it  
238 combines numerical simulations with observational data.

239 The movement of conidia through the atmosphere was modeled vertically and horizontally,  
240 with gravitational settling velocities proportionate to conidial dimensions: 20x7.5µm for *A.*

241 *alternata* and  $100 \times 10 \mu\text{m}$  for *A. solani* (spore density approximated as  $1 \text{ g/cm}^3$ ; 63). Models  
242 simulate dry deposition by randomly removing spores that travel close to the ground using a  
243 constant rate proportional to the deposition velocity. Turbulent eddy diffusivity was estimated  
244 following Beljaars & Holtslag (“BH”; 64).

245 In each simulation, a total of 500 000 conidia of each species were released from central  
246 Wisconsin (44.119N, -89.536W) at an altitude of 10 m. Simulations were run per species with  
247 the following initial conditions: July 15, August 1, August 15, and September 1 at 0:00, 10:00,  
248 and 14:00 hours for the years 2009-2018 (a total of 240 combinations of parameters). Dates and  
249 times were chosen based on historical data of peak conidial concentrations (54). Simulations  
250 lasted 288 hours, at which point the latitude, longitude, maximum height, and time of deposition  
251 were recorded for each of the 500 000 conidia released at time zero per each of the 240  
252 parameter sets.

253 The output of each simulation was imported into R v3.6.2 (R Core Team). The distance  
254 travelled by each spore from take-off to deposition was calculated using the WGS84 terrestrial  
255 reference system with *geosphere* v. 1.5-10 (65). To visualize the geographic spread of conidia,  
256 data were aggregated by date of release and year. Landing times were grouped into six-hour  
257 intervals from zero to 266 hours. The centroid of the spatial range traveled by all conidia within  
258 each six-hour interval was calculated and an ellipse was drawn around each centroid, with the  
259 major axis oriented in the direction of maximum spread from the centroid. The major axis radius  
260 is equal to the standard deviation of the distance travelled along the direction of the major axis  
261 by spores that sediment within the six-hour interval. Similarly, the minor axis represents one  
262 standard deviation of the distance travelled in the direction perpendicular to the major axis by all  
263 spores that sediment within the 6-hour interval. Ellipses were calculated using *aspace* v3.2 and

264 custom in-house scripts ([https://github.com/jacobgolan/Alternaria\\_Dispersal.git](https://github.com/jacobgolan/Alternaria_Dispersal.git); 66). To  
265 minimize two dimensional distortions of spore trajectories across Earth's curved surface, the R  
266 package *sp* v.1.4-0 was used to correct the latitude and longitude of each spore from an  
267 EPSG:2288 coordinate system to EPSG:4326 (67).

268

## 269 **RESULTS**

### 270 **Counting germinated spores**

271 Germinability was successfully quantified for *A. alternata* and *A. solani* conidia using  
272 automated counting algorithms: automated and manual counts are strongly correlated (Figure  
273 S2).

274

### 275 **Identifying parameters most likely to maximize spore germination (Experiment 1)**

276 *Fitting models:* Experiment 1 data enabled identification of the combinations of UV, RH and  
277 T resulting in greatest numbers of germinated conidia (Table 1). Full models were computed  
278 using time, wavelength (UVA, UVB or darkness), RH, T, and irradiance ( $W/m^2$ ; Figure 1) and  
279 simplified final models were chosen by comparing models' Akaike Information Criterion (AIC).

280 The number of germinated conidia on each coverslip was modeled as a random variable  
281 distributed according to a negative binomial distribution. The expected value of the distribution,  
282 conditioned on each treatment, took the form:

$$E(N_{germinate} | t, RH, UV, T, surface, N_{total}) = N_{total} e^{\beta_0 + \beta t + \gamma_{RH} + \tau_T + \lambda_{UV} + \varepsilon_{surface}}$$

283 where  $N_{total}$  is the total number of conidia on a coverslip (alive and dead);  $\beta$  is a parameter  
284 quantifying how quickly germination decreases and  $t$  is time of exposure to a specific condition

285 (in days);  $\gamma_{RH}$ ,  $\tau_T$  and  $\lambda_{UV}$  are parameters quantifying the effects of RH, T and exposure to UV  
286 light.  $\varepsilon_{surface}$  represents the random effects on each surface (a random variable distributed  
287 according to a Gaussian centered at zero and with a standard deviation  $\sigma$ ). The fit produces  
288 estimates for our nine coefficients of interest ( $\beta$ ,  $\gamma_{60\%}$ ,  $\gamma_{75\%}$ ,  $\gamma_{90\%}$ ,  $\tau_{15^\circ C}$ ,  $\tau_{20^\circ C}$ ,  $\tau_{25^\circ C}$ ,  $\lambda_{UVA}$  and  $\lambda_{UVB}$ )  
289 and we choose RH = 50%, T = 10°C and no UV exposure as a reference condition, hence  $\gamma_{50\%} =$   
290  $\tau_{10^\circ C} = \lambda_{dark} = 0$ . Exponentiated coefficients greater than 1 translate to an increase in germinability  
291 with respect to the reference condition, and exponentiated coefficients less than 1 translate to a  
292 decrease in germinability with respect to the reference condition (Figure 4).  $\beta_0$  is the intercept  
293 accounting for dead spores in the reference condition at  $t = 0$ .

294 We next compared models' AIC to identify the minimum number of parameters needed to  
295 explain experimental data without overfitting. The best-fitting model of *A. solani* conidia  
296 germination did not include T, but to enable comparisons between *A. solani* and *A. alternata*, we  
297 selected the second-best *A. solani* model, which included T and was identical to the best fit *A.*  
298 *alternata* model (Table 1).

299 Models identify both UV wavelengths as detrimental to germination ( $e^{\lambda_{UVA}} = 0.89$  and  $0.82$ ,  
300 and  $e^{\lambda_{UVB}} = 0.16$  and  $0.37$ , for *A. alternata* and *A. solani* respectively, Figure 4). Conidia kept in  
301 darkness germinated most readily and UVB exposure resulted in the smallest numbers of  
302 germinated conidia (Figure 3). While we observed differences in conidial germinability among  
303 different wavelengths (Figure 3), selected models did not include irradiance ( $W/m^2$ ) as a  
304 parameter (Table 1). Kruskal-Wallis followed by *post-hoc* Dunn tests confirm this result (Table  
305 4).

306 Relative humidities of 90% maximized germination at all temperatures and UV wavelengths  
307 ( $e^{\gamma_{90\%}} = 1.25$  and  $1.75$  for *A. alternata* and *A. solani* respectively, Figure 4). Kruskal-Wallis

308 followed by *post-hoc* Dunn tests confirm this result (Kruskal-Wallis  $\chi^2 = 225.05, 77.664, 28.624,$   
309 respectively, all with  $df = 3$ ,  $p\text{-value} < 0.0001$  for each; Table S4).

310 Results for T were less consistent than results for RH or UV. Models suggest 15°C  
311 maximized germination for both species (Figure 4), but *A. alternata* conidia kept at 90% RH  
312 appear to germinate equally well at both 15°C and 20°C ( $p\text{-value} < 0.05$ ; Table S3, Figure 3).  
313 Kruskal-Wallis followed by *post-hoc* Dunn tests were also inconclusive ( $\chi^2 = 11.28\text{-}55.14$ ,  $df =$   
314  $3$ ,  $0.01 < p\text{-value} < 6.40 \times 10^{-12}$ ; Table S4). Because 90% RH clearly maximized the germination  
315 of both species' conidia, temperature was reinvestigated using only the four conditions (7-10)  
316 involving 90% RH (Table 1, Figure 4):

$$E(N_{germinate} | RH = 90\%, t, T, surface, UV, N_{total}) = N_{total} e^{\beta_0 + \beta t + \tau_T + \lambda_{UV} + \varepsilon_{surface}}$$

317 Results were more consistent; according to both model effect sizes (Figure 4, Table 3, Table S3),  
318 and Kruskal-Wallis and *post-hoc* Dunn tests (Table S4), 15°C is the most favorable temperature  
319 for *A. alternata* germinability, and 20°C is the most favorable for *A. solani* germinability.

320 Based on these results, parameters chosen for Experiment 2 included an RH of 90% and T of  
321 15°C for *A. alternata* (2A), and 90% RH and 20°C for *A. solani* (2S). We exposed conidia to  
322 alternating periods of 12 hours UVA light and 12 hours darkness at an irradiance of  $6.29 \pm 0.17$   
323  $\text{W/m}^2$ , equivalent to the lowest UVA-40W dosage administered in Experiment 1 and a UV  
324 environment typical of the troposphere (Table S2; **29**).

325

326 **Measuring spore germination over timescales consistent with long distance dispersal**

327 **(Experiment 2):**

328 The two *Alternaria* species demonstrated markedly different germination patterns over 288  
329 hours. A greater total number of conidia and proportion (i.e., fraction of total conidia) of *A.*

330 *alternata* conidia germinated at all sampling points (hours 0, 24, 72, 144, 214 and 288),  
331 compared to *A. solani* conidia (Figure 5). Germinability of *A. alternata* conidia decreased  
332 linearly over time, but germinability of *A. solani* conidia fell sharply within 24 hours and  
333 subsequently plateaued. Germinability remained at approximately 12-20% after 24 hours and a  
334 visual inspection of *A. solani* conidia suggests most conidia germinating after 24 hours develop  
335 atypical germ tubes, compared to conidia germinating at 0 hours (Figure S5). These abnormally  
336 growing conidia could not be measured by custom MIPAR algorithms because they were  
337 designed to provide a binary classification (germinated/ungerminated). Atypical conidia grew  
338 germ tubes reaching a length of approximately 100-150 $\mu$ m (compared to ~200 $\mu$ m or more at 0  
339 hours) and germ tube growth was delayed (Golan pers. obs.). Differences between *A. alternata*  
340 and *A. solani* germination are corroborated by Experiment 1 data: the germinability of *A.*  
341 *alternata* conidia decreases linearly over time, but germinability of *A. solani* conidia falls sharply  
342 within 24 hours of the start of the experiment (Figure S6). In Experiment 2, the half-life of  
343 germinability for *A. alternata* is approximately 35 hours (i.e., ~2% loss in germinability per hour  
344 under UVA). In stark contrast, the half-life of germinability for *A. solani* is approximately 1.5  
345 hours (i.e., ~47% loss in germinability within the first 24 hours).

346

347 *Effective Dispersal:* The HYSPLIT simulations of conidia dispersing from central Wisconsin  
348 show the smaller conidia of *A. alternata* as travelling over greater ranges than the larger conidia  
349 of *A. solani* (Figure 5; Figure 6). But spore size does not affect the speed of movement, instead,  
350 it affects the altitude of spores and controls how long a spore will remain aloft. The number of *A.*  
351 *solani* conidia in the air decreases two to three times faster than the number of *A. alternata*  
352 conidia in the air (Figure 6). By 144 hours (day 6) no *A. solani* conidia remain aloft (in any

353 simulation). By contrast, at 288 hours (day 12) significant numbers of *A. alternata* conidia are  
354 still found in the atmosphere (in all simulations). Before all *A. solani* conidia settle, they can  
355 travel as far as *A. alternata* (more than ~3,000 km, Figure 6), but the number of conidia reaching  
356 these long distances is less than 1% of the total released, as compared to *A. alternata*.  
357 Similarities are greatest for the two species at release times 10:00 CST and 14:00 CST, during  
358 midday when wind turbulence is greatest. At a release time of 0:00 CST, *A. solani* conidia settle  
359 to the ground before day three, while *A. alternaria* conidia are reaching Greenland on day nine.  
360 But even at release times 10:00 CST and 14:00 CST, dispersal dynamics are very different for  
361 the two species (Figure 5). Ranges for *A. solani* are elongate and rather narrow, compared to the  
362 more circular, broader ranges of *A. alternata*, and the edges of *A. solani*'s ranges will involve  
363 many fewer conidia, as compared to the edges of *A. alternata*'s ranges (Figure 6). Because the  
364 germinability of *A. solani* conidia declines rapidly most or all spores at its ranges' edges will be  
365 inviable.

366

## 367 **DISCUSSION**

368 We tested how temperature, relative humidity, UV light exposure, and their combinations  
369 affect the germinability of *A. alternata* and *A. solani* (8; 12). Next, we measured survival in a  
370 favorable environment over a timescale consistent with continental dispersal. We combined the  
371 survival data with models of spore movement to offer a realistic bound on the effective (as  
372 opposed to potential) dispersal of spores in the atmosphere (4; 5). We specifically chose to  
373 measure longer-timescale survival in a favorable and realistic, but unnaturally static,  
374 tropospheric environment to probe the edges of the potential reach of spores, asking, "how far  
375 would the 'luckiest' spores of either species travel"?



376 The effective dispersal of the two species is very different. As an illustration, consider the  
377 ability of *A. solani* and *A. alternata* to reach Maine (a potato growing state) when both are  
378 released at 10:00 CST: less than 1% of *A. solani* reach Maine and most are inviable; by contrast,  
379 upwards of 25% of *A. alternata* reach Maine and 75% of them are still viable (Figure 5; Figure  
380 6). The combination of more time aloft and greater longevity results in a larger number of *A.*  
381 *alternata* conidia travelling hundreds to thousands of kilometers and landing still able to cause  
382 infection (Figure 5). Less than 1% of *A. solani* conidia are still in the atmosphere after 24 hours  
383 and because these spores either cannot germinate or germinate abnormally, they are unlikely to  
384 cause disease.

385 The conidia of *A. alternata* are both small enough to travel over 1 500 kilometers and  
386 physiologically equipped to survive the journey (3; 68; 69; 70). We can find no data addressing  
387 the global population biology of *A. alternata*, but based on our experiments we hypothesize it  
388 may function as a single, global population, similar to *Aspergillus fumigatus* (71).

389 The larger conidia of *A. solani* are more vulnerable to atmospheric hazards than the smaller  
390 spores of *A. alternata*. A shorter lifespan of larger spores is unintuitive, as larger spores are often  
391 assumed to be more resilient than smaller spores (12; 43; 72; 73). Other species of *Alternaria*  
392 with large conidia also experience rapid declines in germinability when exposed to atmospheric  
393 conditions: in one experiment, 95% of *A. macrocarpa* conidia were unable to germinate after  
394 four days (10; 39). *Alternaria* fungi with large conidia are clustered in the monophyletic section  
395 *Porri* (see Figure 19 in 45). Perhaps species with large conidia are not under selective pressures  
396 to endure long-haul atmospheric travel because they settle out of the atmosphere quickly. At  
397 least among fungal spores that disperse in the atmosphere, we hypothesize a negative correlation  
398 between spore size and survival time in the atmosphere.

399 The timing of spore liberation will also influence effective dispersal. Lagomarsino Oneto et  
400 al. (5) establish the timing of spore ejection as playing a major role in determining how long  
401 spores dwell in the atmosphere before returning to the ground. For example, solar heat transfer  
402 causes atmospheric mixing, and consequently, all else being equal, spores released during the  
403 day settle less readily and will undergo longer journeys than spores released at night (5). Thus,  
404 we hypothesize that spore size, longevity, and the timing of spore release evolve and influence  
405 each other dynamically: spores undergoing long journeys facilitated by their small size and/or  
406 release patterns are selected for increased atmospheric survival, whereas spores traveling short  
407 distances resulting from their large size and/or release times in calm atmospheric conditions  
408 (e.g., at night), are under less selective pressure for longer-term atmospheric survival.

409 Our survival data are in broad agreement with data generated by other studies (11; 74; 75; 76;  
410 77). For example, Magan et al. (68) also found RH as crucial to determining *A.*  
411 *alternata* germinability. Rotem et al. (10) found the germinability of *A. solani* conidia to  
412 decrease by 20% after eight hours' exposure to sunlight. While UVB is clearly detrimental to  
413 germinability (Figure 3; Figure S2; Figure S3) in our experiments, interestingly, a small number  
414 of conidia exposed to UVB still germinated. We hypothesize these spores were shielded within  
415 clusters of spores. The clumping of dispersing spores is a rarely investigated phenomenon but it  
416 may be an important strategy used by fungi to survive harsh environments (4; 35; 78; 79; 80).

417 Tests of our hypotheses should include multiple large sets of closely related species with  
418 distinct spore morphologies and dispersal strategies. Because the genus *Alternaria* encompasses  
419 a diversity of spore shapes and sizes, it emerges as a model for studying the biophysical  
420 constraints and evolutionary tradeoffs of fungal dispersal within a phylogenetic framework.

421

422 Supporting Information can be found [here](#)

423

#### 424 **Acknowledgments:**

425 We gratefully acknowledge support from UW-Madison's Botany Department and funding from  
426 the United States Department of Agriculture, National Institute of Food and Agriculture, Hatch  
427 1013478. In addition, **J.G.** was funded by a National Science Foundation Graduate Research  
428 Fellowship, North American Mycological Association Memorial Fellowship, and a Botany  
429 Department E.K. and O.N. **A.S.** and **D.L.O.** were funded by the European Research Council  
430 (ERC) under the European Union's Horizon 2020 research and innovation programme (grant  
431 agreement No. 101002724 RIDING); the Air Force Office of Scientific Research under award  
432 number FA8655-20-1-7028. Allen Fellowship. **T.A.R.** was funded by the Genomic Sciences  
433 Program, U.S. Department of Energy, Office of Science, Biological and Environmental  
434 Research, as part of the Plant-Microbe Interfaces Scientific Focus Area at ORNL  
435 (<http://pmi.ornl.gov>); Oak Ridge National Laboratory is managed by UT-Battelle, LLC, for the  
436 U.S. Department of Energy under contract DEAC05-00OR22725. We are also grateful to Cécile  
437 Ané and Andrea Mazzino for their expertise and guidance throughout, and to Doug Sykes for  
438 making this study possible.

439

440 **Data Availability Statement:** All data and scripts can be found at

441 [https://github.com/jacobgolan/Alternaria\\_Dispersal.git](https://github.com/jacobgolan/Alternaria_Dispersal.git)

442

#### 443 **References**

444 **1.** Bowden J, Gregory PH, Johnson CG. Possible wind transport of coffee leaf rust across the  
445 Atlantic Ocean. *Nature*. 1971 229(5285):500–1.

446 **2.** Purdy LH, Krupa SV, Dean JL. Introduction of sugarcane rust into the Americas and its  
447 spread to Florida. *Plant disease (USA)*. 1985

448 **3.** Brown JKM, Hovmøller MS. Aerial dispersal of pathogens on the global and continental  
449 scales and its impact on plant disease. *Science*. 2002 297(5581):537–41.

450 **4.** Golan JJ, Pringle A. Long-Distance Dispersal of Fungi. *Microbiol Spectr*. 2017 5(4).

451 **5.** Lagomarsino Oneto D, Golan J, Mazzino A, Pringle A, Seminara A. Timing of fungal  
452 spore release dictates survival during atmospheric transport. *PNAS*. 2020 117(10):5134–43.

453 **6.** Malloch D, Blackwell M. Dispersal of fungal diaspores. In: *The Fungal Community*. New  
454 York: Marcel Dekker; 1992. p. 147–71.

455 **7.** Peay KG, Bruns TD. Spore dispersal of basidiomycete fungi at the landscape scale is  
456 driven by stochastic and deterministic processes and generates variability in plant–fungal  
457 interactions. *New Phytologist*. 2014; 204(1):180–91.

458 **8.** Aylor D. *Aerial Dispersal of Pollen and Spores*. The American Phytopathological Society;  
459 2017. p. 418. (Epidemiology).

460 **9.** Maddison AC, Manners JG. Sunlight and viability of cereal rust uredospores. *Transactions*  
461 *of the British Mycological Society*. 1972 59(3):429–43.

- 462 **10.** Rotem J, Wooding B, Aylor DE. The role of solar radiation, especially ultraviolet, in the  
463 mortality of fungal spores. *Phytopathology (USA)*. 1985.
- 464 **11.** Aylor DE, Sanogo S. Germinability of *Venturia inaequalis* conidia exposed to sunlight.  
465 *Phytopathology*. 1997 87(6):628–33.
- 466 **12.** Norros V, Karhu E, Nordén J, Vähätalo AV, Ovaskainen O. Spore sensitivity to sunlight  
467 and freezing can restrict dispersal in wood-decay fungi. 2015 5(16):3312–26.
- 468 **13.** Hawker LE, Madelin MF. The dormant spore. In: Weber DJ, Hess WM, editors. *The*  
469 *Fungal Spore: Form and Function*. New York: John Wiley; 1976. p. 235–44.
- 470 **14.** Hoekstra FA. Pollen and Spores: Desiccation tolerance in pollen and the spores of lower  
471 plants and fungi. In: Black M, Pritchard HW, editors. *Desiccation and Survival in Plants:*  
472 *Drying Without Dying*. CABI; 2002.
- 473 **15.** Ayerst G. The effects of moisture and temperature on growth and spore germination in  
474 some fungi. *Journal of Stored Products Research*. 1969 5(2):127–41.
- 475 **16.** Gervais P, Fasquel J-P, Molin P. Water relations of fungal spore germination. *Appl*  
476 *Microbiol Biotechnol*. 1988 29(6):586–92.
- 477 **17.** Magan N. Effects of water potential and temperature on spore germination and germ-tube  
478 growth in vitro and on straw leaf sheaths. *Transactions of the British Mycological Society*.  
479 1988 90(1):97–107.
- 480 **18.** Piepenbring M, Hagedorn G, Oberwinkler F. Spore Liberation and Dispersal in Smut  
481 Fungi. *Botanica Acta*. 1998 111(6):444–60.
- 482 **19.** Pasanen A-L, Pasanen P, Jantunen MJ, Kalliokoski P. Significance of air humidity and  
483 air velocity for fungal spore release into the air. *Atmospheric Environment Part A General*  
484 *Topics*. 1991 25(2):459–62.
- 485 **20.** Verant ML, Boyles JG, Waldrep W, Wibbelt G, Blehert DS. Temperature-dependent  
486 growth of *Geomyces destructans*, the fungus that causes bat white-nose syndrome. *PLoS*  
487 *One*. 2012 7(9).
- 488 **21.** Park S, Chen Z-Y, Chanda AK, Schneider RW, Hollier CA. Viability of *Phakopsora*  
489 *pachyrhizi* urediniospores under simulated southern Louisiana winter temperature conditions.  
490 *Plant Disease*. 2008 92(10):1456–62.
- 491 **22.** Bonde MR, Berner DK, Nester SE, Frederick RD. Effects of temperature on  
492 urediniospore germination, germ tube growth, and initiation of infection in soybean by  
493 *Phakopsora* isolates. *Phytopathology*. 2007 97(8):997–1003.
- 494 **23.** Isard SA, Dufault NS, Miles MR, Hartman GL, Russo JM, De Wolf ED, et al. The Effect  
495 of Solar Irradiance on the Mortality of *Phakopsora pachyrhizi* Urediniospores. *Plant Dis*.  
496 2006 90(7):941–5.

- 497 **24.** Kwon-Chung KJ, Sugui JA. *Aspergillus fumigatus*—What makes the species a ubiquitous  
498 human fungal pathogen? PLoS Pathog. 2013 9(12).
- 499 **25.** Jung JH, Lee JE, Lee CH, Kim SS, Lee BU. Treatment of fungal bioaerosols by a high-  
500 temperature, short-time process in a continuous-flow system. Appl Environ Microbiol. 2009  
501 75(9):2742–9.
- 502 **26.** Koller LR. Ultraviolet Radiation. 2nd Edition. John Wiley & Sons; 1965. p. 314.
- 503 **27.** Robinson N. Global solar and sky radiation and their main spectral regions. In: Tromp  
504 SW, editor. Medical Biometeorology. Amsterdam, the Netherlands: Elsevier; 1963. p. 55–71.
- 505 **28.** Diffey BL. Solar ultraviolet radiation effects on biological systems. Phys Med Biol. 1991  
506 36(3):299–328.
- 507 **29.** Iqbal M. An Introduction to Solar Radiation. Saint Louis, USA: Elsevier Science &  
508 Technology; 1983.
- 509 **30.** Zerefos CS, Bais AF. Solar ultraviolet radiation: modelling, measurements and effects.  
510 Berlin/Heidelberg, Germany: Springer Berlin / Heidelberg; 1997.
- 511 **31.** International Agency for Research on Cancer. Solar and Ultraviolet Radiation. In: IARC  
512 Monographs on the Evaluation of Carcinogenic Risks to Humans. Geneva, Switzerland:  
513 World Health Organisation; 2012. p. 363.
- 514 **32.** Sarantopoulou E, Stefi A, Kollia Z, Palles D, Petrou PS, Bourkoula A, et al. Viability of  
515 Cladosporium herbarum spores under 157 nm laser and vacuum ultraviolet irradiation, low  
516 temperature (10 K) and vacuum. Journal of Applied Physics. 2014 116(10):104701.
- 517 **33.** Parnell M, Burt PJA, Wilson K. The influence of exposure to ultraviolet radiation in  
518 simulated sunlight on ascospores causing Black Sigatoka disease of banana and plantain. Int  
519 J Biometeorol. 1998 42(1):22–7.
- 520 **34.** Singaravelan N, Grishkan I, Beharav A, Wakamatsu K, Ito S, Nevo E. Adaptive melanin  
521 response of the soil fungus *Aspergillus niger* to UV radiation stress at “Evolution Canyon”,  
522 Mount Carmel, Israel. PLoS One. 2008 3(8).
- 523 **35.** Li X, Mo JY, Yang XB. Frequency distribution of soybean rust urediospore clumps  
524 collected from naturally infected kudzu leaves in Nanning, China. Poster presented at:  
525 National Soybean Rust Symposium; 2006; St. Louis, Missouri.
- 526 **36.** Li X, Yang X, Mo J, Guo T. Estimation of soybean rust uredospore terminal velocity, dry  
527 deposition, and the wet deposition associated with rainfall. Eur J Plant Pathol. 2008 123(4):3
- 528 **37.** Norros V, Rannik U, Hussein T, Petäjä T, Vesala T, Ovaskainen O. Do small spores  
529 disperse further than large spores? Ecology. 2014 95(6):1612–21.
- 530 **38.** Hussein T, Norros V, Hakala J, Petäjä T, Aalto PP, Rannik Ü, et al. Species traits and  
531 inertial deposition of fungal spores. Journal of Aerosol Science. 2013 61:81–98.

- 532 **37.** Rotem J, Aust HJ. The effect of ultraviolet and solar radiation and temperature on  
533 survival of fungal propagules. *Journal of Phytopathology*. 1991 133(1):76–84.
- 534 **38.** Isard SA, Barnes CW, Hambleton S, Ariatti A, Russo JM, Tenuta A, et al. Predicting  
535 Soybean Rust incursions into the North American continental interior using crop monitoring,  
536 spore trapping, and aerobiological modeling. *Plant Dis*. 2011 95(11):1346–57.
- 537 **39.** Jongejans E, Skarpaas O, Ferrari MJ, Long ES, Dauer JT, Schwarz CM, et al. A unifying  
538 gravity framework for dispersal. *Theor Ecol*. 2015 8(2):207–23.
- 539 **40.** Woo C, An C, Xu S, Yi S-M, Yamamoto N. Taxonomic diversity of fungi deposited from  
540 the atmosphere. *The ISME Journal*. 2018 12(8):2051–60.
- 541 **41.** Calhim S, Halme P, Petersen JH, Læssøe T, Bässler C, Heilmann-Clausen J. Fungal  
542 spore diversity reflects substrate-specific deposition challenges. *Scientific Reports*. 2018  
543 8(1):1–9.
- 544 **42.** Rotem J. *The Genus Alternaria: Biology, Epidemiology and Pathogenicity*. APS Press,  
545 American Phytopathological Society; 1994. p. 344.
- 546 **43.** Woudenberg JHC, Groenewald JZ, Binder M, Crous PW. *Alternaria* redefined. *Stud*  
547 *Mycol*. 2013 75(1):171–212.
- 548 **44.** Barberán A, Ladau J, Leff JW, Pollard KS, Menninger HL, Dunn RR, et al. Continental-  
549 scale distributions of dust-associated bacteria and fungi. *PNAS*. 2015 112(18):5756–61.
- 550 **45.** Ding S, Meinholz K, Cleveland K, Jordan SA, Gevens AJ. Diversity and virulence of  
551 *Alternaria* spp. causing potato early blight and brown spot in Wisconsin. *Phytopathology*.  
552 2019 109(3):436–45.
- 553 **46.** National Agriculture Statistics Service (NASS). Press Release: 09/12/2019: Potato  
554 Summary. United States Department of Agriculture. 2019 (September).
- 555 **47.** Singh RP, Hodson DP, Huerta-Espino J, Jin Y, Bhavani S, Njau P, et al. The Emergence  
556 of Ug99 Races of the Stem Rust Fungus is a Threat to World Wheat Production. *Annu Rev*  
557 *Phytopathol*. 2011 49(1):465–81.
- 558 **48.** Prussin AJ, Li Q, Malla R, Ross SD, Schmale DG. Monitoring the long-distance transport  
559 of *Fusarium graminearum* from field-scale sources of inoculum. *Plant Disease*. 2013  
560 98(4):504–11.
- 561 **49.** Bashan Y, Levanony H, Or R. Wind dispersal of *Alternaria alternata*, a cause of leaf  
562 blight of cotton. *Journal of Phytopathology*. 1991 133(3):225–38.
- 563 **50.** McCartney HA, Schmechel D, Lacey ME. Aerodynamic diameter of conidia of  
564 *Alternaria* species. *Plant Pathology*. 1993 42(2):280–6.
- 565 **51.** Pscheidt JW. *Epidemiology and control of potato early blight, caused by Alternaria solani*.  
566 University of Wisconsin-Madison; 1985.

- 567 **52.** Ding S, Rouse DI, Meinholz K, Gevens AJ. Aerial concentrations of pathogens causing  
568 early blight and brown spot within susceptible potato fields. *Phytopathology*. 2019  
569 109(8):1425–32.
- 570 **55.** Crutcher, H.L. 1969. Temperature & humidity in the troposphere. In Rex 1969, 45-84 (3)
- 571 **53.** Blumthaler M, Ambach W, Rehwald W. Solar UV-A and UV-B radiation fluxes at two  
572 Alpine stations at different altitudes. *Theor Appl Climatol*. 1992 46(1):39–44.
- 573 **54.** Blumthaler M, Ambach W, Ellinger R. Increase in solar UV radiation with altitude.  
574 *Journal of Photochemistry and Photobiology B: Biology*. 1997 39(2):130–4.
- 575 **58.** Dvorkin AY, Steinberger EH. Modeling the altitude effect on solar UV radiation. *Solar*  
576 *Energy*. 1999 65(3):181–7.
- 577 **59.** Hardin JW, Hilbe JM. *Generalized Linear Models and Extensions*. Stata Press; 2018.  
578 598
- 579 **60.** Bolker BM. Post-model-fitting procedures with *glmmTMB* models: diagnostics,  
580 inference, and model output. 2020.
- 581 **61.** Stein AF, Draxler RR, Rolph GD, Stunder BJB, Cohen MD, Ngan F. NOAA’s HYSPLIT  
582 atmospheric transport and dispersion modeling system. *Bull Amer Meteor Soc*. 2015  
583 96(12):2059–77.
- 584 **62.** Mesinger F, DiMego G, Kalnay E, Mitchell K, Shafran PC, Ebisuzaki W, et al. North  
585 American regional reanalysis. *Bulletin of the American Meteorological Society*. 2006  
586 87(3):343–60.
- 587 **63.** D. Savage, M. J. Barbetti, M. J. MacLeod, M. U. Salam, M. Renton. Timing of propagule  
588 release significantly alters the deposition area of resulting aerial dispersal. *Divers.*  
589 *Distrib*. 2010 16:288–299.
- 590 **64.** Beljaars ACM, Holtslag A. M. Flux parameterization over land surfaces for atmospheric  
591 models. *J Appl Meteor*. 1991 30(3):327–41.
- 592 **65.** Hijmans RJ. Introduction to the *geosphere* package (Version 1.2-19). 2011.
- 593 **66.** Buliung RN, Rempel TK. Open source, spatial analysis, and activity-travel behaviour  
594 research: capabilities of the *aspace* package. *Journal of Geographical Systems*. 2008  
595 10(2):191–216.
- 596 **67.** Pebesma EJ, Bivand RJ. Classes and methods for spatial data in R. *R News*. 2005 5(2):9–  
597 13.
- 598 **68.** Magan N, Cayley GR, Lacey J. Effect of water activity and temperature on mycotoxin  
599 production by *Alternaria alternata* in culture and on wheat grain. *Appl Environ Microbiol*.  
600 1984 47(5):1113–7.
- 601 **69.** Pringle A. Asthma and the diversity of fungal spores in air. 2013 9(6):e1003371.

- 602       **70.** Bush RK, Prochnau JJ. *Alternaria*-induced asthma. *Journal of Allergy and Clinical*  
603       *Immunology*. 2004 113(2):227–34.
- 604       **71.** Pringle A, Baker DM, Platt JL, Wares JP, Latgé JP, Taylor JW. Cryptic speciation in the  
605       cosmopolitan and clonal human pathogenic fungus *Aspergillus fumigatus*. *Evolution*. 2005  
606       59(9):1886–99.
- 607       **72.** Kausserud H, Colman JE, Ryvarde L. Relationship between basidiospore size, shape and  
608       life history characteristics: a comparison of polypores. *Fungal Ecology*. 2008 1(1):19–23.
- 609       **83.** Jones A.M. and Harrison R.M., The effects of meteorological factors on atmospheric  
610       bioaerosol concentrations—a review *Review Sci Total Environ*. 2014 326:151
- 611       **74.** Leach CM. Interaction of near-ultraviolet light and temperature on sporulation of the  
612       fungi *Alternaria*, *Cercospora*, *Fusarium*, *Helminthosporium*, and *Stemphylium*. *Can J Bot*.  
613       1967 45(11):1999–2016.
- 614       **75.** Fourtouni A, Manetas Y, Christias C. Effects of UV-B radiation on growth,  
615       pigmentation, and spore production in the phytopathogenic fungus *Alternaria solani*. *Can J*  
616       *Bot*. 1998 76(12):2093–9.
- 617       **76.** Braga GUL, Rangel DEN, Fernandes ÉKK, Flint SD, Roberts DW. Molecular and  
618       physiological effects of environmental UV radiation on fungal conidia. *Curr Genet*. 2015  
619       61(3):405–25.
- 620       **77.** García-Cela ME, Marín S, Reyes M, Sanchis V, Ramos AJ. Conidia survival of  
621       *Aspergillus* section *Nigri*, *Flavi* and *Circumdati* under UV-A and UV-B radiation with  
622       cycling temperature/light regime. *J Sci Food Agric*. 2016 96(6):2249–56.
- 623       **78.** Dias, A. Epidemiological studies of shading effects on Asian soybean rust. Iowa State;  
624       2008.
- 625       **79.** Furukawa S, Narisawa N, Watanabe T, Kawarai T, Myozen K, Okazaki S, et al.  
626       Formation of the spore clumps during heat treatment increases the heat resistance of bacterial  
627       spores. *Int J Food Microbiol*. 2005 102(1):107–11.
- 628       **80.** Schwinghamer EA. The relation of survival to radiation dose in rust fungi. *Radiat Res*.  
629       1958 8(4):329–43.

630  
631       **Figure Legends:**  
632

633       **Figure 1:** Experiment 1 experimental setup. Clear plexiglass surfaces (or “steps”) were arranged  
634       at different heights beneath a UVA or UVB light source. Quartz cover slips coated in spore  
635       suspensions of either *A. alternata* or *A. solani* were placed on each plexiglass step using a  
636       randomized block design. UV bulbs were suspended above the 20 steps (an additional step was  
637       kept in complete darkness, labelled “Dark”). A module encompasses all surfaces underneath one  
638       of the four UV bulbs of a given wavelength (UVA or UVB) and power (Watts). There are four



639 modules. The experimental apparatus was placed in an environmental chamber and a single  
640 relative humidity (RH) and temperature (T) specific to one of ten environments (conditions 1-10)  
641 was maintained and monitored every five minutes by an automated system during each of the  
642 experimental runs (1-10). Experimental runs took place in series, one after the other, using the  
643 same chamber. Lights cycled through a 12-hour on, 12-hour off schedule for the 96 hours of each  
644 experimental run and four cover slips were sampled from each step at 24-hour intervals. Black  
645 plastic tarp was placed between each module to prevent leakage of UV light between modules.  
646 Conidia did not germinate on cover slips.

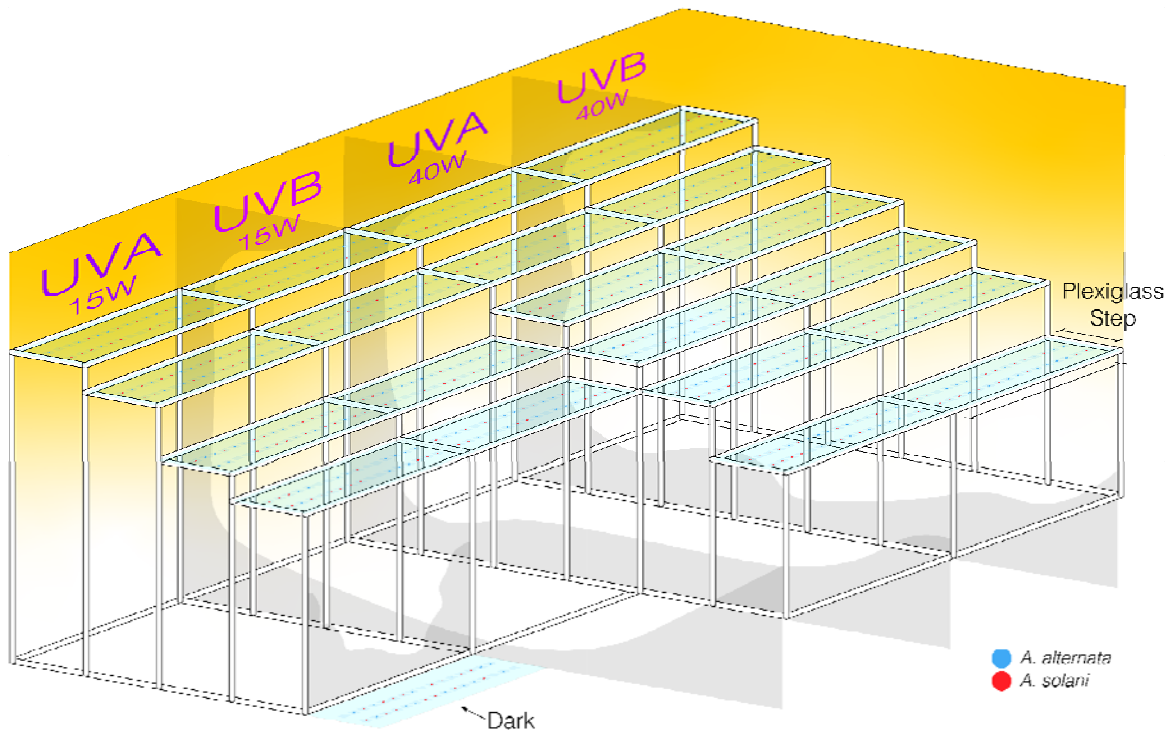

647  
648 **Figure 2:** Example images of germinating conidia of *A. alternata* (blue) and *A. solani* (red) on  
649 water agar plates. Boxes 1 and 2 show germinated and ungerminated conidia, respectively.  
650 Boxes 3-5 illustrate debris, out-of-focus conidia, and uncountable clusters of conidia,  
651 respectively.

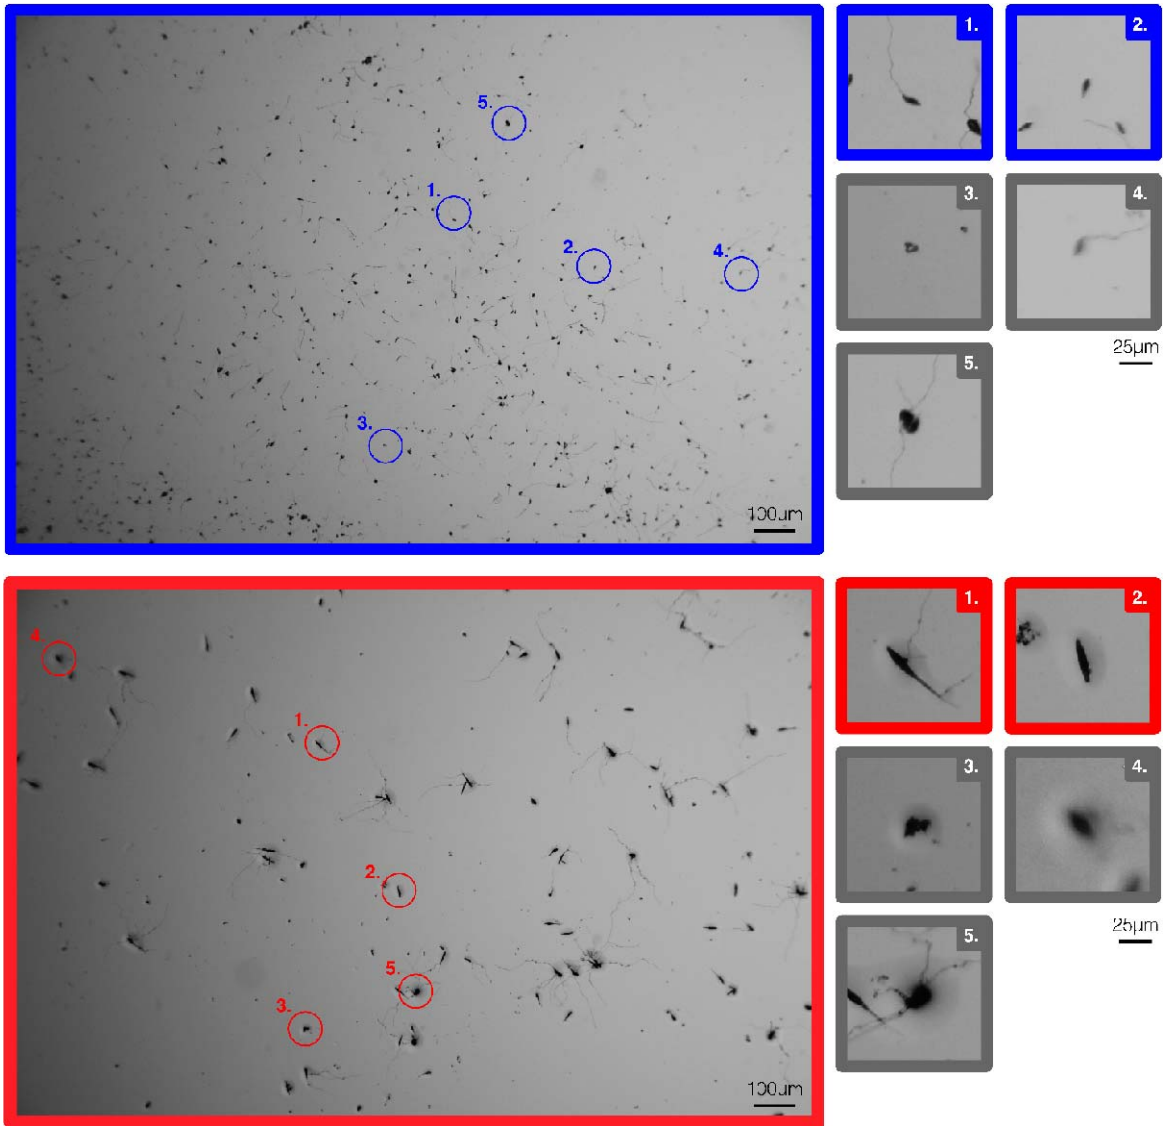

652  
653 **Figure 3:** Experiment 1: Proportion of conidia relative to initial number of conidia germinating  
654 after 96 hours for all tested relative humidities (RH %), temperatures (T °C), and UV dosages.  
655 Data of *A. alternata* are blue and data of *A. solani* red. Tones of blue and red mark different RH  
656 environments.

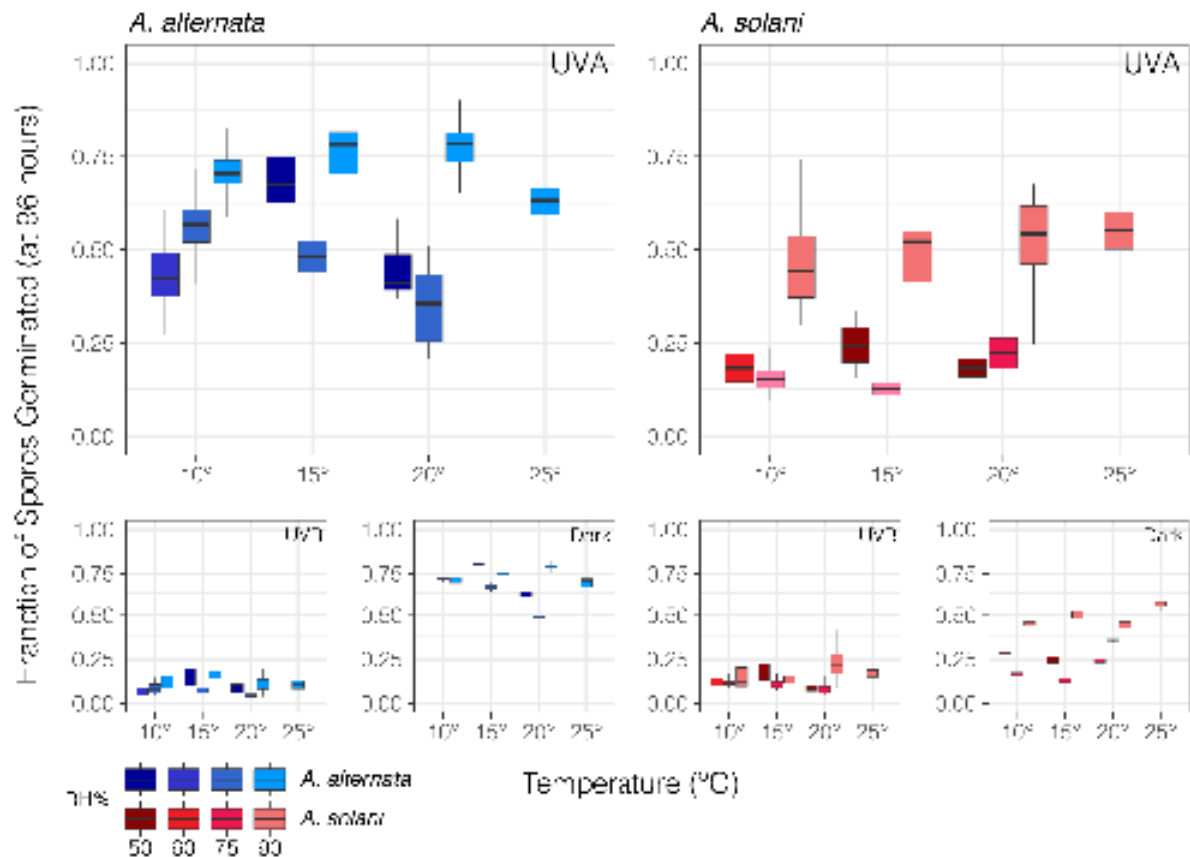

657  
 658 **Figure 4:** Summary of effect sizes for parameters included in best-fit generalized linear mixed  
 659 models. Effect sizes shown in exponentiated form. Panels A) and B) show estimates for models  
 660 including all ten Experiment 1 conditions, and (C) and (D) show effect sizes from models fitting  
 661 only conditions 7-10, or the conditions for which RH was held at 90%. Values for *A. alternata*  
 662 and *A. solani* shown in blue and red, respectively.

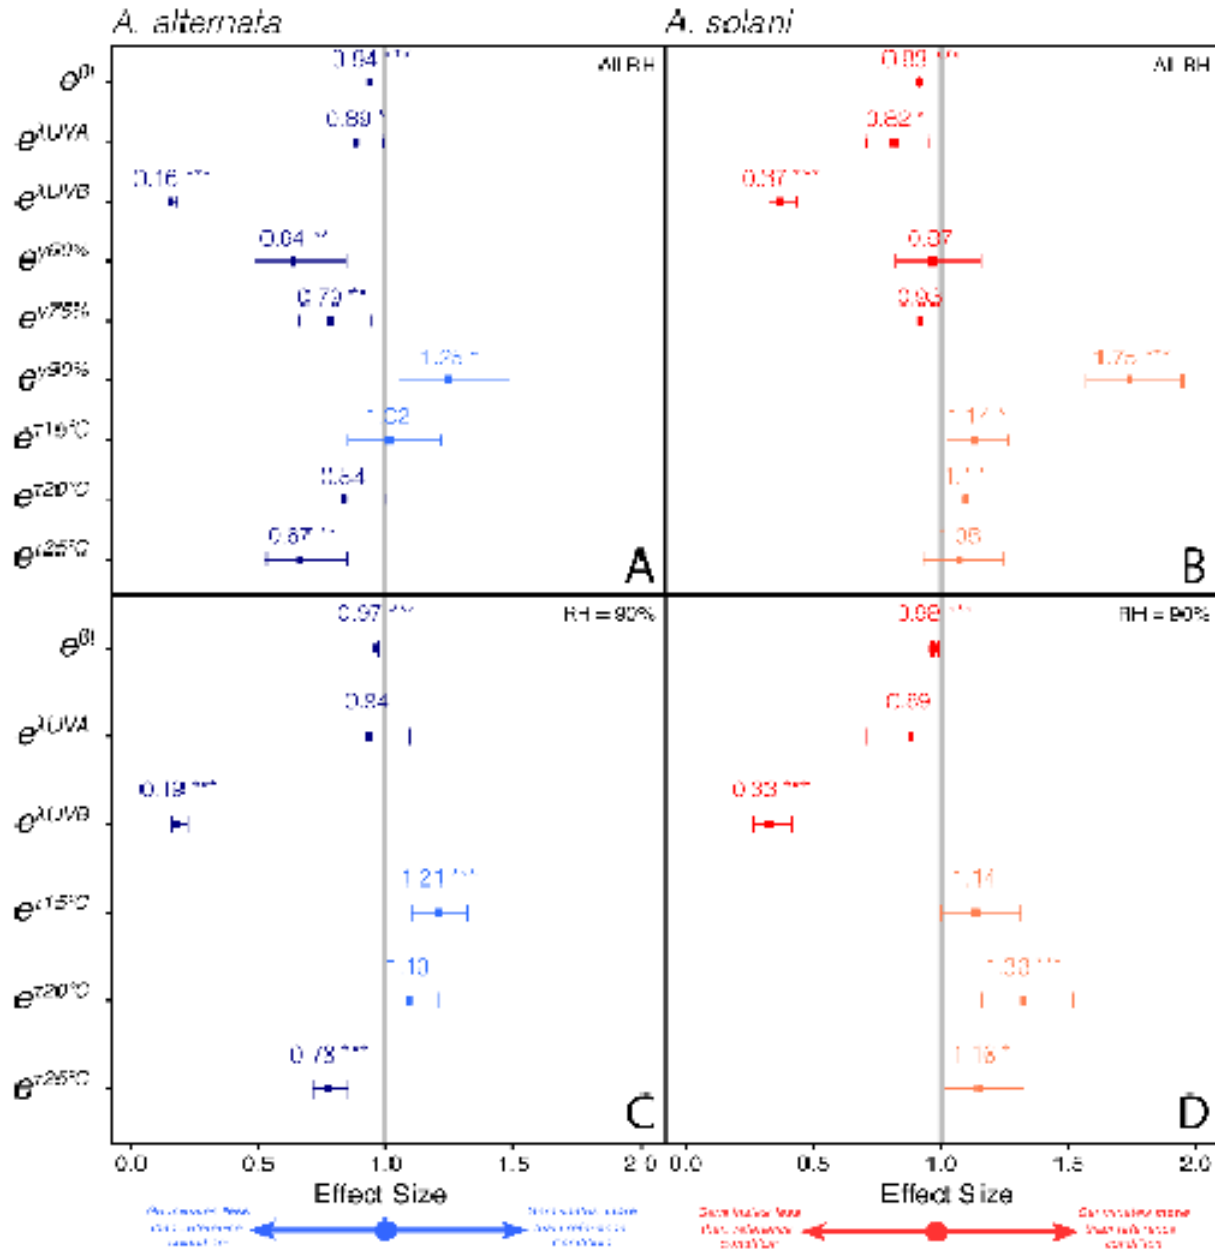

663  
 664 **Figure 5:** (A-C, E-G) Spatial visualization of HYSPLIT models. Maps show release times 0:00,  
 665 10:00 and 14:00 CST averaged over ten years. Simulations for *A. alternata* and *A. solani*,  
 666 shown in blue and red, respectively, with colors becoming less intense as time increases. Data for  
 667 each six-hour interval are summarized as ellipses with major axes in the direction of maximum  
 668 spread, and lengths as one standard deviation of the mean distance travelled in each 24-hour  
 669 period (ranges marked with dotted outlines). (D & H) Proportion of germinated spores averaged  
 670 per block (slide), Experiment 2. Data in blue and red for *A. alternata* and *A. solani*, respectively.  
 671 Data for spores kept in darkness shown in grey inset.

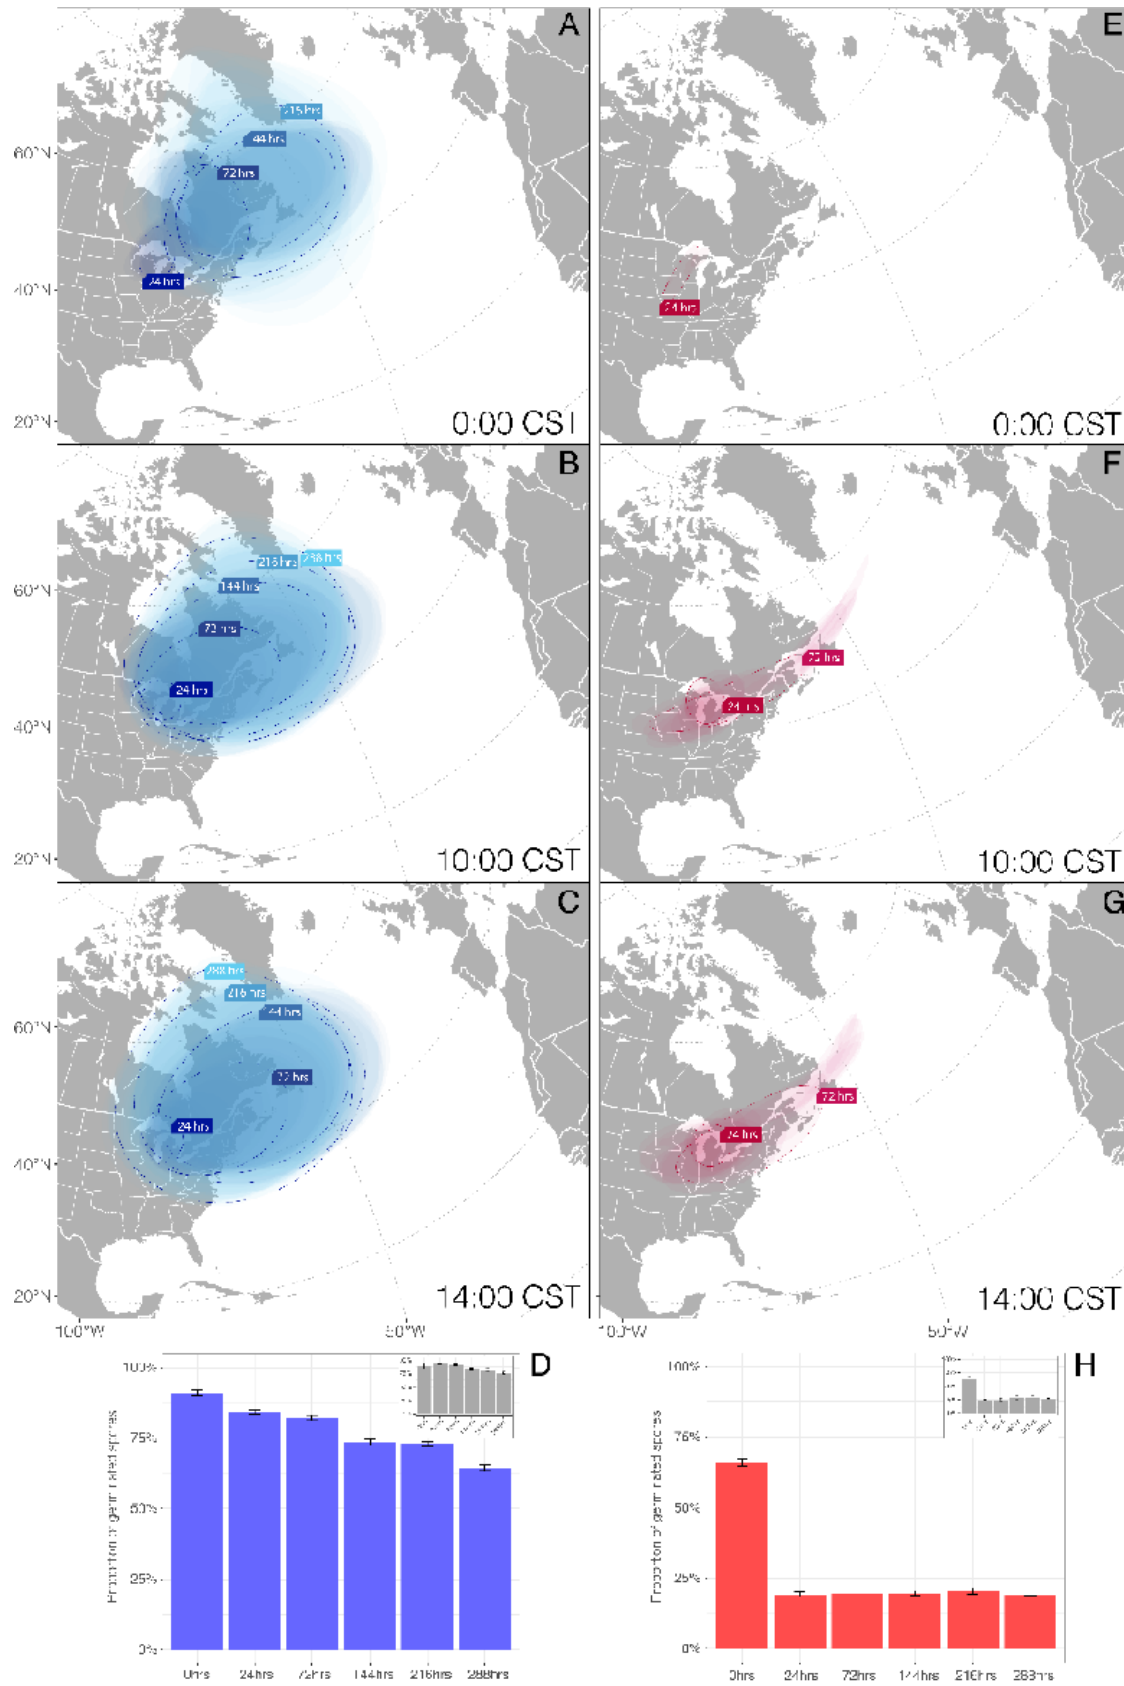

673 **Figure 6:** Results of HYSPLIT models of spore dispersal showing spores remaining airborne as  
674 a function of time after take-off. Small insets show the same data for the first 12 hours. Spores  
675 remaining aloft over time shown in blue and red for *A. alternata* and *A. solani*, respectively.  
676 Trajectories were simulated for three release times: 0:00 (solid line), 10:00 (dotted line), and  
677 14:00 (dashed line). All conidia of *A. solani* settle before the end of the 288-hour simulation.  
678 Shades correspond to the number of standard errors from the mean, means represented by black  
679 trend lines.

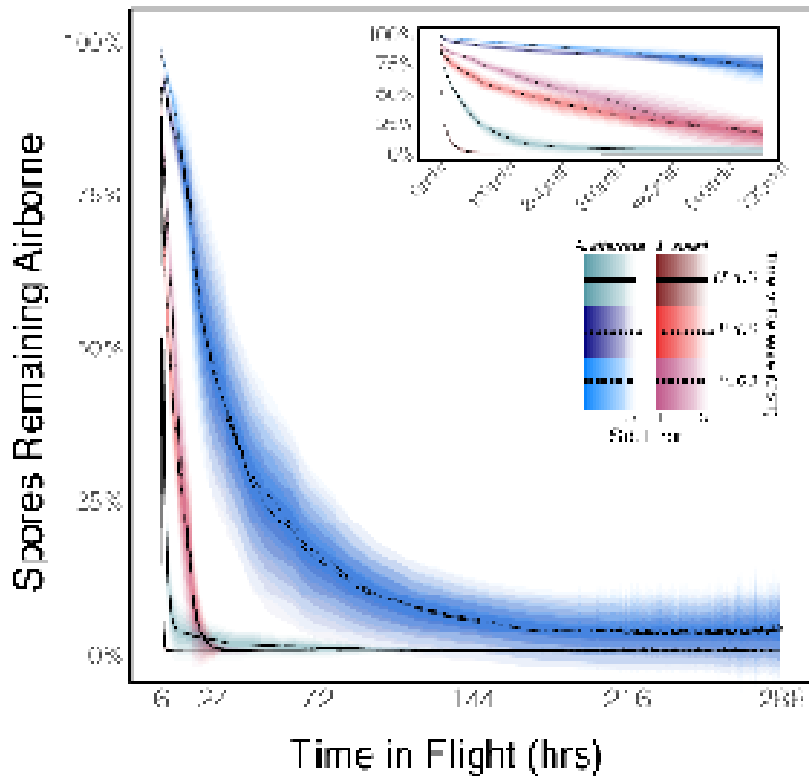

680  
681  
682  
683

**Table 1:** A. Best model summaries for Experiment I conditions 1-10. B. Summary of multiple comparisons of means using Tukey contrasts for best fit mixed models. Contrasts are shown for *A. alternata* (blue), and *A. solani* (red) for relative humidity (lower triangle) and temperature (upper triangle). Main values are pairwise estimates and values in parenthesis are p-values.

| <b>Best Models Summary</b>      | <i>time</i> | <i>wavelength</i> | <i>rel. humidity</i> | <i>temperature</i> | <i>irradiance</i> | $\Delta AIC_c$ |
|---------------------------------|-------------|-------------------|----------------------|--------------------|-------------------|----------------|
| <i>A. alternata</i>             | ×           | ×                 | ×                    | ×                  |                   | –              |
|                                 | ×           | ×                 | ×                    |                    |                   | 4.000808       |
|                                 | ×           | ×                 |                      |                    |                   | 7.139997       |
| <i>A. solani</i>                | ×           | ×                 | ×                    |                    |                   | –              |
|                                 | ×           | ×                 | ×                    | ×                  |                   | 1.453145       |
|                                 | ×           | ×                 |                      | ×                  |                   | 18.875176      |
| <i>A. alternata</i><br>(RH=90%) | ×           | ×                 |                      | ×                  |                   | –              |
|                                 | ×           | ×                 |                      |                    |                   | 10.64697       |
|                                 | ×           | ×                 | ×                    |                    |                   | 71.2029        |
| <i>A. solani</i><br>(RH=90%)    | ×           | ×                 | ×                    | ×                  |                   | –              |
|                                 | ×           | ×                 | ×                    |                    |                   | 10.94995       |
|                                 | ×           | ×                 |                      |                    |                   | 14.6156        |
|                                 |             |                   |                      |                    |                   |                |
|                                 |             |                   |                      |                    |                   |                |
|                                 |             |                   |                      |                    |                   |                |
|                                 |             |                   |                      |                    |                   |                |
|                                 |             |                   |                      |                    |                   |                |
|                                 |             |                   |                      |                    |                   |                |
|                                 |             |                   |                      |                    |                   |                |
|                                 |             |                   |                      |                    |                   |                |
|                                 |             |                   |                      |                    |                   |                |
|                                 |             |                   |                      |                    |                   |                |
